# Supplementary material for: Genome-Scale Analysis of the Grapevine KCS Genes Reveals Its Potential Role in Male Sterility
Source: MDPI journal article supplement (doi:10.3390/ijms24076510), 2023-03-30
Supplement: s1 [file s1]

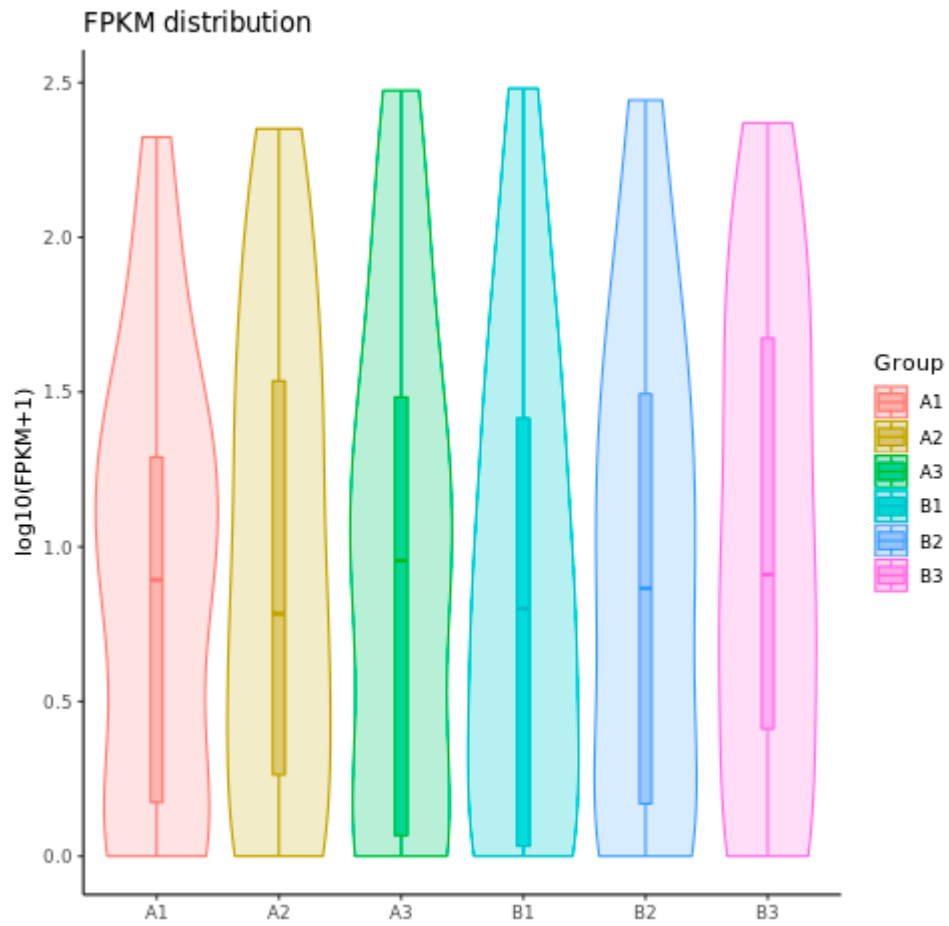

**Figure S1.** The FPKM distribution of *VvKCS* genes in grapevine. A1, 'Y-14' of meiosis stage. A2, 'Y-14' of the tetrad stage. A3, 'Y-14' of the early mononuclear stage. B1, 'Shine Muscat' of the meiosis stage. B2, 'Shine Muscat' of the tetrad stage. B3, 'Shine Muscat' of the early mononuclear stage.

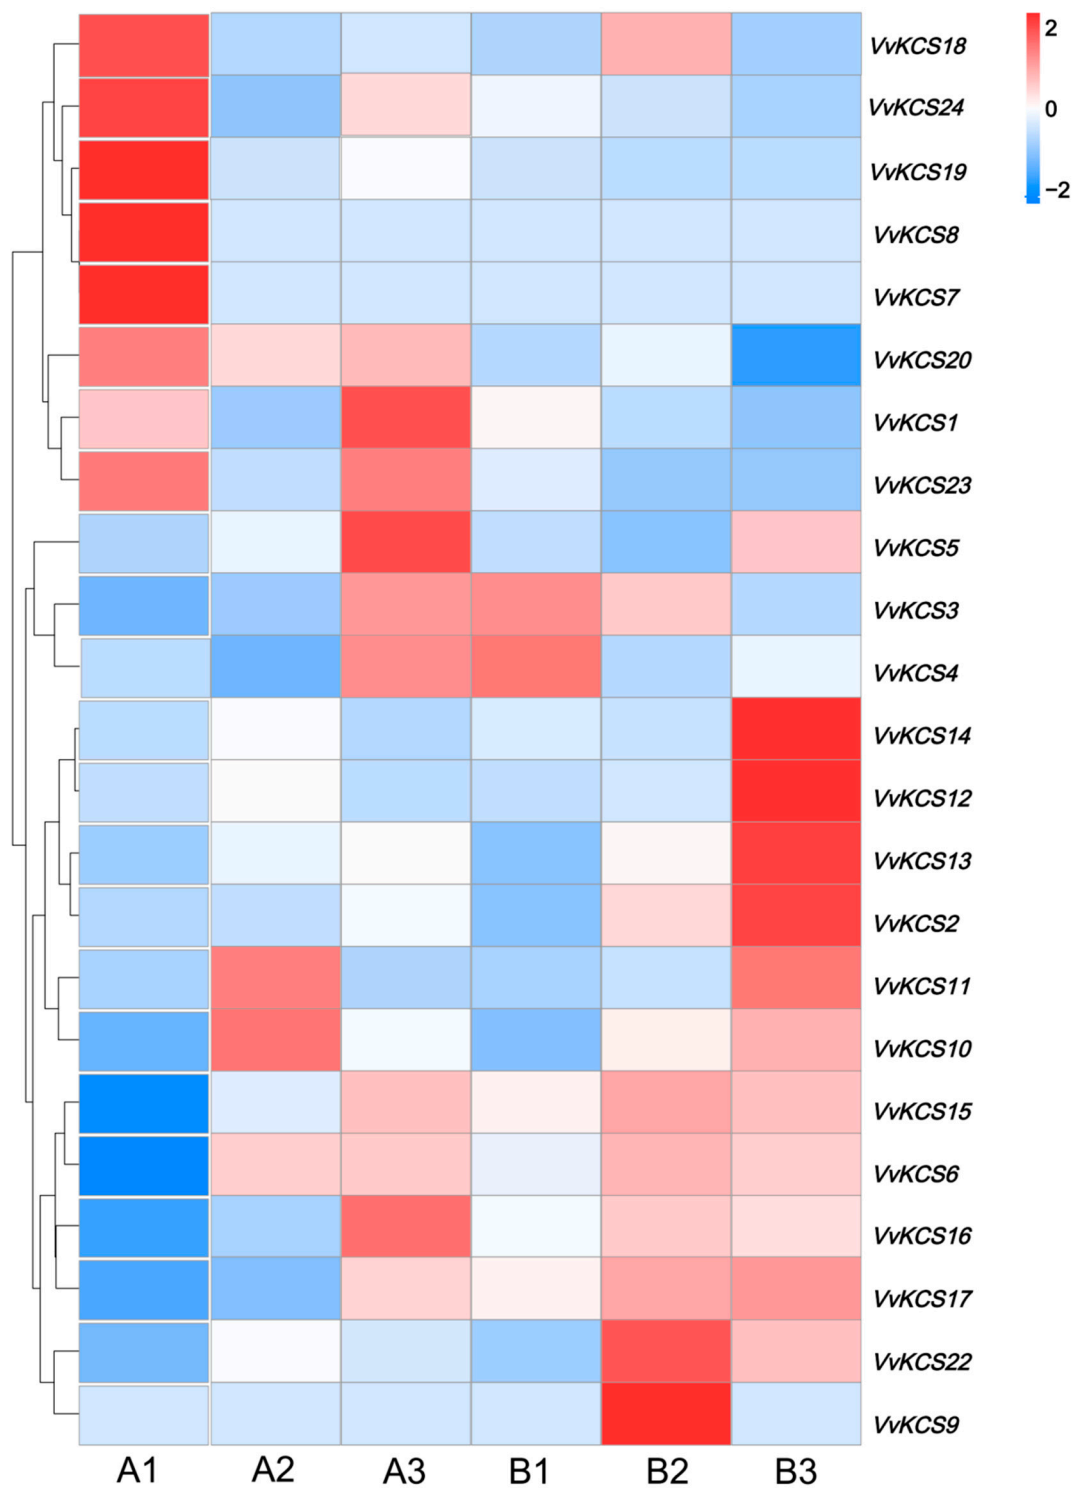

**Figure S2.** Expression heatmap of *VvKCS* genes in grapevine. A1, 'Y-14' of meiosis stage. A2, 'Y-14' of the tetrad stage. A3, 'Y-14' of the early mononuclear stage. B1, 'Shine Muscat' of the meiosis stage. B2, 'Shine Muscat' of the tetrad stage. B3, 'Shine Muscat' of the early mononuclear stage.

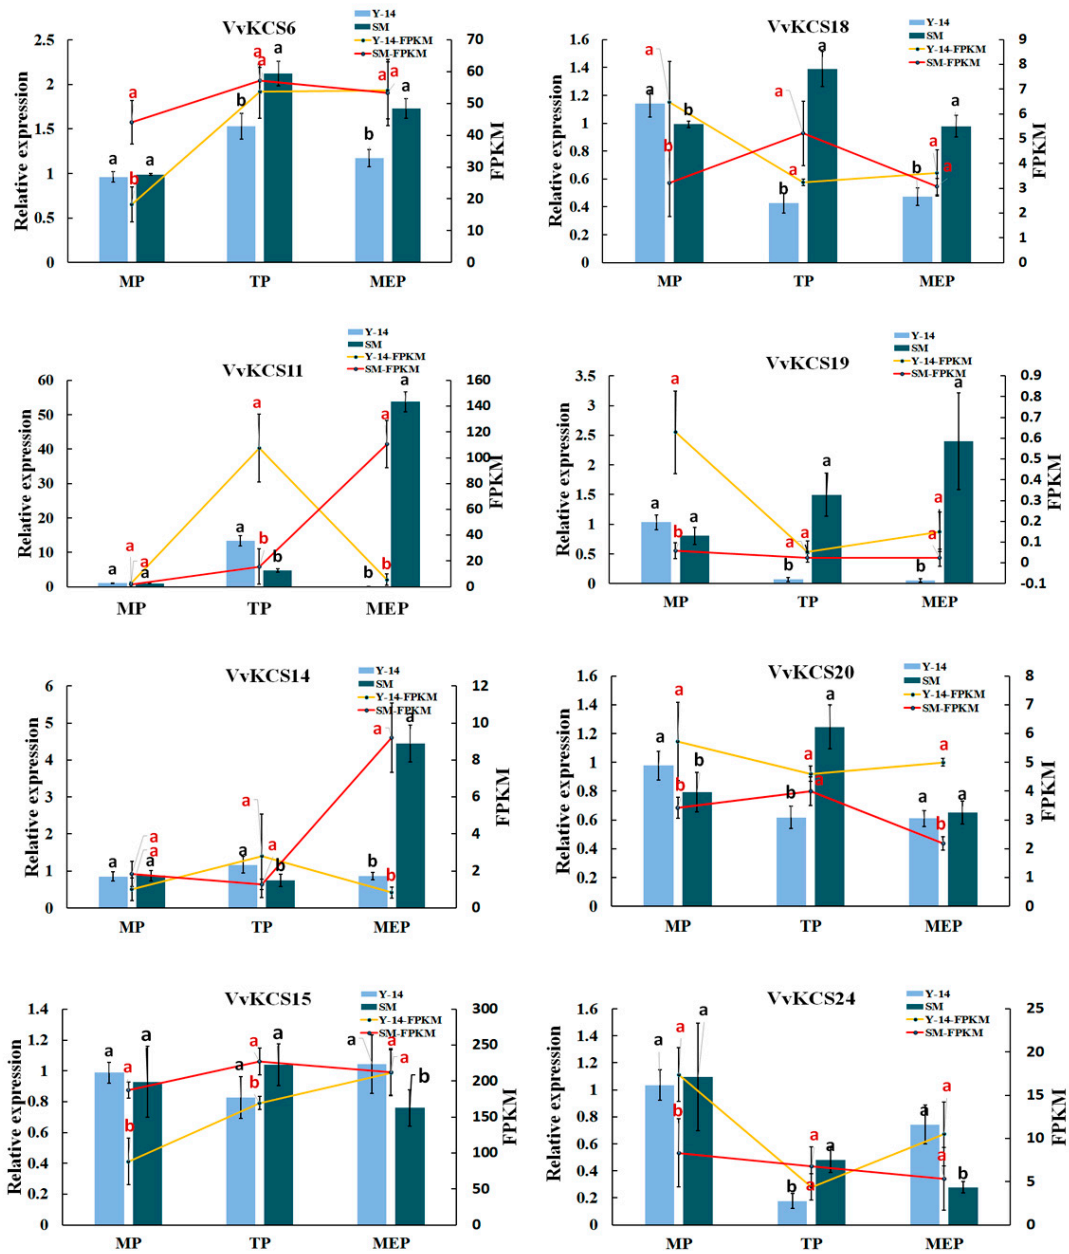

**Figure S3.** RT-qPCR was used to confirm the relative expression levels of *VvKCS* genes in RNA-seq data. The left y-axis shows the relative gene expression levels determined by RT-qPCR, while the right y-axis shows the FPKM levels determined by RNA-seq. Lower-case letters represent a significant difference ( $P \leq 0.05$ ) between ‘Y-14’ and ‘SM’ (Shine Muscat), as demonstrated by Student’s t-test. Black lower-case letters

represent significant differences between RT-qPCR results and red lower-case letters represent significant differences between FPKM results.

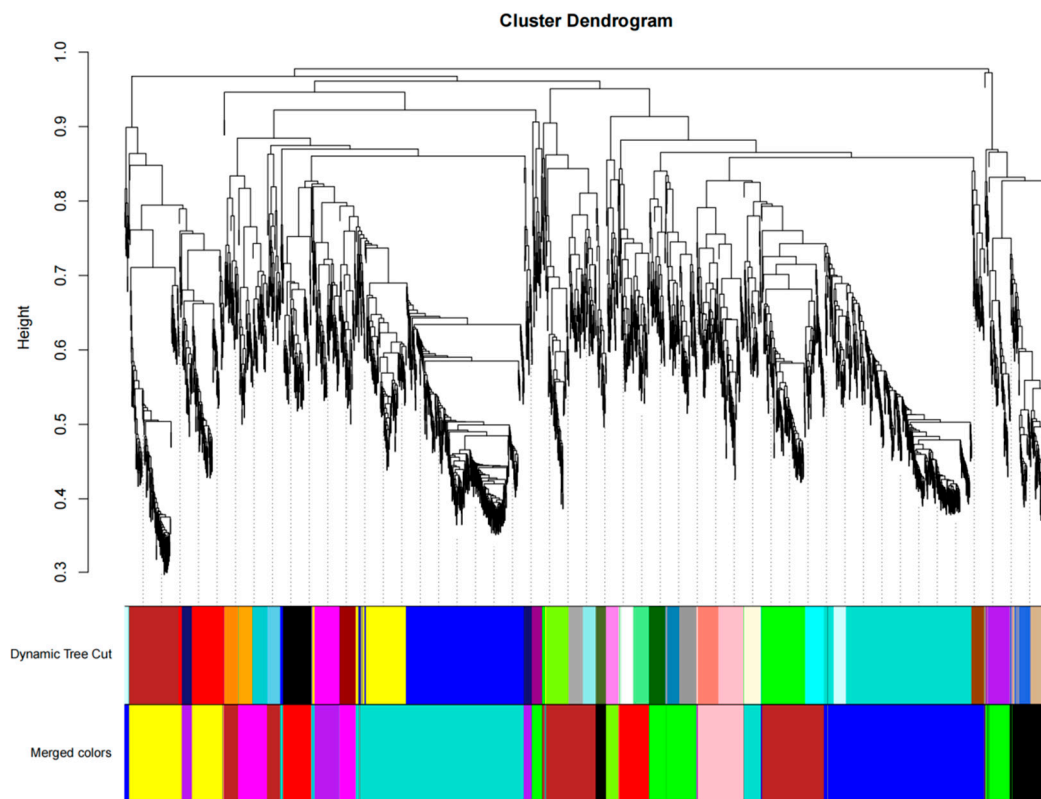

**Figure S4.** Dendrogram of network analysis modules identified by weighted gene co-expression network analysis (WGCNA).
