# Supplementary material for: Genome-Scale Analysis of the Grapevine KCS Genes Reveals Its Potential Role in Male Sterility
Source: MDPI journal article supplement (doi:10.3390/ijms24076510), 2023-03-30
Supplement: s1 [file s1]

**Table S4.** Sequences of primers used in this research.

| Genes          | Primer name | Sequence (5'-3')     | GenBank accession No. |
|----------------|-------------|----------------------|-----------------------|
| <i>VvKCS6</i>  | VvKCS6F     | AGCCTCGAGCTGACTGAGTA | LOC100241584          |
|                | VvKCS6R     | CTGTTGCACTTGAACCCTGC |                       |
| <i>VvKCS11</i> | VvKCS11F    | AGCAGCGAGTGCTCAAGAAT | LOC100256735          |
|                | VvKCS11R    | TGGTTCACCAACATGGCAGA |                       |
| <i>VvKCS14</i> | VvKCS14F    | TGGAAGCCGTTACTCCCAAC | LOC100244668          |
|                | VvKCS14R    | GTGAGACCCCAACAAACCCA |                       |
| <i>VvKCS15</i> | VvKCS15F    | ACAGCCCGAAAATCGTCCTT | LOC100243402          |
|                | VvKCS15R    | GGGCGATATCAATGGCGAGA |                       |
| <i>VvKCS18</i> | VvKCS18F    | GGTGTGGCAGCTTGGAATTG | LOC100244664          |
|                | VvKCS18R    | ACTTGCGTTTGACAGGCTCA |                       |
| <i>VvKCS19</i> | VvKCS19F    | ACCTTGCGAAGGTTTGGGAA | LOC100266985          |
|                | VvKCS19R    | ATATAACCCCCACCACTCCA |                       |

|                |          |                         |              |
|----------------|----------|-------------------------|--------------|
| <i>VvKCS20</i> | VvKCS20F | AGGCCAAAGTTGCTCCTCAA    | LOC100258334 |
|                | VvKCS20R | ATGTCGCGGCTGAGTGTAAG    |              |
| <i>VvKCS24</i> | VvKCS24F | CCCCTAATCCTTCCCGCATC    | LOC100251061 |
|                | VvKCS24R | TGGCCTCAGCATAGGAGAGT    |              |
| <i>VvActin</i> | F        | ATGGCAGACGGAGAGGATATTCA | LOC100232866 |
|                | R        | GCCTTTGCAATCCACATCTGCTG |              |
