# Supplementary material for: Genome-Scale Analysis of the Grapevine KCS Genes Reveals Its Potential Role in Male Sterility
Source: Int J Mol Sci. 2023 Mar 30;24(7):6510. doi: 10.3390/ijms24076510 (PMC10095565; doi:10.3390/ijms24076510)
Supplement: Supplementary file 1 [file ijms-24-06510-s001.zip]

Archive with 5 entries (5 files):
- SUP.table S4.pdf
- SUP.Table1.xlsx
- SUP.Table2.xlsx
- SUP.Table3_KEGG_enrichment pathway.xlsx
- Supplementary figures.pdf
