# Supplementary material for: Genome-Scale Analysis of the Grapevine KCS Genes Reveals Its Potential Role in Male Sterility
Source: Int J Mol Sci. 2023 Mar 30;24(7):6510. doi: 10.3390/ijms24076510 (PMC10095565; doi:10.3390/ijms24076510)
Supplement: Supplementary file 1 [file ijms-24-06510-s001.zip › SUP.Table1.xlsx]

## Sheet: Sheet1
Table S1. Information about the grapevine VvKCS genes identified by genome-wide analysis.
RENAME	ID	gene_name	gene_chr	gene_start	gene_end	gene_strand	gene_length
VvKCS1	100252441	LOC100252441	NC_012007.3	3167438	3169326	+	1889
VvKCS2	100853861	LOC100853861	NC_012009.3	5869532	5875746	+	3538
VvKCS3	100252499	LOC100252499	NC_012010.3	1854656	1857192	+	1923
VvKCS4	100259490	LOC100259490	NC_012010.3	4157745	4160504	-	2566
VvKCS5	100263066	LOC100263066	NC_012011.3	6350351	6352452	-	1932
VvKCS6	100241584	LOC100241584	NC_012012.3	4978500	4980354	-	1855
VvKCS7	100245920	LOC100245920	NC_012013.3	13942	16490	-	1556
VvKCS8	100240826	LOC100240826	NC_012013.3	26641	28961	-	1106
VvKCS9	100263090	LOC100263090	NC_012013.3	40673	43820	-	1536
VvKCS10	100260817	LOC100260817	NC_012024.3	10749713	10751702	+	1990
VvKCS11	100256735	LOC100256735	NC_012015.3	13412770	13414680	+	1658
VvKCS12	100257977	LOC100257977	NC_012016.3	15223707	15225211	-	1505
VvKCS13	100266256	LOC100266256	NC_012017.3	3989197	3992197	+	2422
VvKCS14	100244668	LOC100244668	NC_012018.3	18055450	18057592	-	2143
VvKCS15	100243402	LOC100243402	NC_012019.3	2211603	2213282	-	1680
VvKCS16	100266928	LOC100266928	NC_012020.3	21304233	21306401	-	2169
VvKCS17	100247295	LOC100247295	NC_012021.3	16838283	16840421	-	2139
VvKCS18	100244664	LOC100244664	NC_012022.3	13649396	13651171	-	1776
VvKCS19	100266985	LOC100266985	NC_012022.3	13661195	13662843	-	1649
VvKCS20	100258334	LOC100258334	NC_012022.3	14671259	14672867	+	1609
VvKCS21	100248107	LOC100248107	NC_012025.3	17406478	17408218	-	1741
VvKCS22	100251892	LOC100251892	NW_003724286.1	85526	87149	+	1624
VvKCS23	100251146	LOC100251146	NW_003724189.1	975540	977246	-	1707
VvKCS24	100251061	LOC100251061	NW_003724203.1	379529	380272	-	744
