# Supplementary material for: Genome-Scale Analysis of the Grapevine KCS Genes Reveals Its Potential Role in Male Sterility
Source: Int J Mol Sci. 2023 Mar 30;24(7):6510. doi: 10.3390/ijms24076510 (PMC10095565; doi:10.3390/ijms24076510)
Supplement: Supplementary file 1 [file ijms-24-06510-s001.zip › SUP.Table2.xlsx]

## Sheet: Sheet1
Table S2. Information related to orthologous gene pairs of grapevine VvKCS genes with other plants identified by Synteny analysis.
VvKCS1	==	At-AT1G68530.1
VvKCS1	==	At-AT1G25450.1
VvKCS16	==	At-AT1G68530.1
VvKCS17	==	At-AT1G01120.1
VvKCS10	==	At-AT1G19440.1
VvKCS2	==	At-AT1G19440.1
VvKCS5	==	At-AT1G04220.1
VvKCS6	==	At-AT1G07720.2
VvKCS17	==	At-AT2G46720.1
VvKCS2	==	At-AT2G16280.1
VvKCS3	==	At-AT2G26250.1
VvKCS6	==	At-AT2G28630.1
VvKCS10	==	At-AT4G34510.1
VvKCS2	==	At-AT4G34510.1
VvKCS5	==	At-AT5G43760.1
VvKCS14	==	spe990-mRNA:MD08G0191600
VvKCS15	==	spe990-mRNA:MD01G0093600
VvKCS15	==	spe990-mRNA:MD11G0093500
VvKCS15	==	spe990-mRNA:MD07G0154800
VvKCS16	==	spe990-mRNA:MD16G0038500
VvKCS17	==	spe990-mRNA:MD01G0067500
VvKCS17	==	spe990-mRNA:MD07G0129800
VvKCS20	==	spe990-mRNA:MD01G0154500
VvKCS23	==	spe990-mRNA:MD10G0027500
VvKCS10	==	spe990-mRNA:MD10G0062400
VvKCS10	==	spe990-mRNA:MD15G0022600
VvKCS10	==	spe990-mRNA:MD08G0025800
VvKCS1	==	spe990-mRNA:MD16G0038500
VvKCS2	==	spe990-mRNA:MD10G0062400
VvKCS2	==	spe990-mRNA:MD15G0022600
VvKCS2	==	spe990-mRNA:MD05G0054600
VvKCS2	==	spe990-mRNA:MD08G0025800
VvKCS4	==	spe990-mRNA:MD15G0103500
VvKCS3	==	spe990-mRNA:MD08G0039700
VvKCS5	==	spe990-mRNA:MD13G0178800
VvKCS6	==	spe990-mRNA:MD01G0093600
VvKCS6	==	spe990-mRNA:MD11G0093500
VvKCS6	==	spe990-mRNA:MD03G0085400
VvKCS6	==	spe990-mRNA:MD07G0154800
VvKCS11	==	spe990-mRNA:MD04G0001000
VvKCS10	==	Ma-transcript:Ma06_t29040.1
VvKCS2	==	Ma-transcript:Ma06_t29040.1
VvKCS3	==	Ma-transcript:Ma06_t13200.1
VvKCS5	==	Os-Os11t0591200-01
VvKCS3	==	Os-Os03t0181500-01
