# Supplementary material for: Genome-Scale Analysis of the Grapevine KCS Genes Reveals Its Potential Role in Male Sterility
Source: Int J Mol Sci. 2023 Mar 30;24(7):6510. doi: 10.3390/ijms24076510 (PMC10095565; doi:10.3390/ijms24076510)
Supplement: Supplementary file 1 [file ijms-24-06510-s001.zip › SUP.Table3_KEGG_enrichment pathway.xlsx]

## Sheet: A1_turquiose_KEGG1_KEGGenrich
KEGGID	Description	GeneRatio	BgRatio	pvalue	padj	geneID	geneName	keggID	Count
vvi00062	Fatty acid elongation	5/88	38/4761	0.000597299	0.0388244	100241584/100243402/100266985/100251061/100258334	LOC100241584/LOC100243402/LOC100266985/LOC100251061/LOC100258334	vvi:100241584/vvi:100243402/vvi:100266985/vvi:100251061/vvi:100258334	5
vvi00480	Glutathione metabolism	7/88	121/4761	0.00665925	0.216426	100245600/100247682/100232922/100242547/100256700/109122826/100260496	LOC100245600/LOC100247682/LOC100232922/LOC100242547/LOC100256700/LOC109122826/LOC100260496	vvi:100245600/vvi:100247682/vvi:100232922/vvi:100242547/vvi:100256700/vvi:100246830/vvi:100260496	7
vvi00940	Phenylpropanoid biosynthesis	8/88	193/4761	0.0253154	0.394431	100260291/100260726/100245197/100259574/100261471/100245432/100261865/100267215	LOC100260291/LOC100260726/LOC100245197/LOC100259574/LOC100261471/LOC100245432/LOC100261865/LOC100267215	vvi:100260291/vvi:100260726/vvi:100245197/vvi:100259574/vvi:100261471/vvi:100245432/vvi:100261865/vvi:100267215	8
vvi00945	Stilbenoid, diarylheptanoid and gingerol biosynthesis	3/88	36/4761	0.0280844	0.394431	100233030/100247273/100267215	OMT2.1/LOC100247273/LOC100267215	vvi:100233030/vvi:100247273/vvi:100267215	3
vvi00999	Biosynthesis of secondary metabolites - unclassified	2/88	15/4761	0.0303409	0.394431	100261471/100267215	LOC100261471/LOC100267215	vvi:100261471/vvi:100267215	2
vvi00350	Tyrosine metabolism	3/88	49/4761	0.0611504	0.587763	100254909/100266870/100232854	LOC100254909/LOC100266870/ADH2	vvi:100254909/vvi:100266870/vvi:100232854	3
vvi04626	Plant-pathogen interaction	7/88	192/4761	0.0632975	0.587763	100263254/100247858/100253943/100249639/novel.247/100265187/100263309	LOC100263254/LOC100247858/LOC100253943/LOC100249639/-/LOC100265187/LOC100263309	vvi:100263254/vvi:100247858/vvi:100253943/vvi:100249639/vvi:104881042/vvi:100265187/vvi:100263309	7
vvi00564	Glycerophospholipid metabolism	4/88	91/4761	0.0867956	0.635781	100264832/100261040/100264200/100261491	LOC100264832/LOC100261040/LOC100264200/LOC100261491	vvi:100264832/vvi:100261040/vvi:100264200/vvi:100261491	4
vvi00950	Isoquinoline alkaloid biosynthesis	2/88	27/4761	0.0880312	0.635781	100254909/100266870	LOC100254909/LOC100266870	vvi:100254909/vvi:100266870	2
vvi00592	alpha-Linolenic acid metabolism	3/88	60/4761	0.0985335	0.640468	100241751/100232854/109121418	LOC100241751/ADH2/LOC109121418	vvi:100241751/vvi:100232854/vvi:100255333	3
vvi00500	Starch and sucrose metabolism	5/88	143/4761	0.123853	0.658703	100263079/100245197/100259574/109121477/100245045	LOC100263079/LOC100245197/LOC100259574/LOC109121477/LOC100245045	vvi:100263079/vvi:100245197/vvi:100259574/vvi:100251838/vvi:100245045	5
vvi00910	Nitrogen metabolism	2/88	35/4761	0.135977	0.658703	100264320/100258765	LOC100264320/LOC100258765	vvi:100264320/vvi:100258765	2
vvi00561	Glycerolipid metabolism	3/88	76/4761	0.16508	0.658703	100264832/100264200/100261491	LOC100264832/LOC100264200/LOC100261491	vvi:100264832/vvi:100264200/vvi:100261491	3
vvi00130	Ubiquinone and other terpenoid-quinone biosynthesis	2/88	40/4761	0.168291	0.658703	100261471/100267215	LOC100261471/LOC100267215	vvi:100261471/vvi:100267215	2
vvi00010	Glycolysis / Gluconeogenesis	4/88	123/4761	0.191902	0.658703	100256754/100250615/100232854/100854135	LOC100256754/LOC100250615/ADH2/LOC100854135	vvi:100256754/vvi:100250615/vvi:100232854/vvi:100854135	4
vvi00620	Pyruvate metabolism	3/88	83/4761	0.197552	0.658703	100256754/100250615/100854135	LOC100256754/LOC100250615/LOC100854135	vvi:100256754/vvi:100250615/vvi:100854135	3
vvi00603	Glycosphingolipid biosynthesis - globo and isoglobo series	1/88	12/4761	0.200796	0.658703	100853373	LOC100853373	vvi:100853373	1
vvi04122	Sulfur relay system	1/88	12/4761	0.200796	0.658703	novel.476	-	vvi:104877909	1
vvi03060	Protein export	2/88	45/4761	0.201755	0.658703	100854416/100853033	LOC100854416/LOC100853033	vvi:100854416/vvi:100853033	2
vvi04075	Plant hormone signal transduction	7/88	264/4761	0.214189	0.658703	104879269/100243627/100250384/100266398/100247734/100263979/100252008	LOC104879269/LOC100243627/LOC100250384/LOC100266398/LOC100247734/LOC100263979/LOC100252008	vvi:100263734/vvi:100243627/vvi:100250384/vvi:100266398/vvi:100247734/vvi:100258759/vvi:100252008	7
vvi00591	Linoleic acid metabolism	1/88	13/4761	0.215605	0.658703	109121418	LOC109121418	vvi:100255333	1
vvi00380	Tryptophan metabolism	2/88	50/4761	0.235914	0.658703	100254909/100257504	LOC100254909/LOC100257504	vvi:100254909/vvi:100257504	2
vvi00020	Citrate cycle (TCA cycle)	2/88	51/4761	0.242794	0.658703	100256754/100854135	LOC100256754/LOC100854135	vvi:100256754/vvi:100854135	2
vvi00740	Riboflavin metabolism	1/88	16/4761	0.258425	0.658703	100267389	LOC100267389	vvi:100267389	1
vvi04933	AGE-RAGE signaling pathway in diabetic complications	1/88	16/4761	0.258425	0.658703	100246006	LOC100246006	vvi:100246006	1
vvi00562	Inositol phosphate metabolism	2/88	54/4761	0.263481	0.658703	100233007/100246006	LOC100233007/LOC100246006	vvi:100233007/vvi:100246006	2
vvi00330	Arginine and proline metabolism	2/88	56/4761	0.277286	0.667539	100232922/100241347	LOC100232922/LOC100241347	vvi:100232922/vvi:100241347	2
vvi00710	Carbon fixation in photosynthetic organisms	2/88	61/4761	0.311707	0.699182	100256754/100854135	LOC100256754/LOC100854135	vvi:100256754/vvi:100854135	2
vvi00565	Ether lipid metabolism	1/88	20/4761	0.311943	0.699182	100261040	LOC100261040	vvi:100261040	1
vvi00460	Cyanoamino acid metabolism	2/88	64/4761	0.332216	0.710039	100245197/100259574	LOC100245197/LOC100259574	vvi:100245197/vvi:100259574	2
vvi00730	Thiamine metabolism	1/88	23/4761	0.349558	0.710039	novel.476	-	vvi:104877909	1
vvi00904	Diterpenoid biosynthesis	1/88	23/4761	0.349558	0.710039	100257500	LOC100257500	vvi:100257500	1
vvi00770	Pantothenate and CoA biosynthesis	1/88	24/4761	0.361638	0.712318	100251716	LOC100251716	vvi:100251716	1
vvi00790	Folate biosynthesis	1/88	26/4761	0.385139	0.736294	100267389	LOC100267389	vvi:100267389	1
vvi04144	Endocytosis	3/88	133/4761	0.448176	0.82723	100261040/100852697/100251857	LOC100261040/LOC100852697/LOC100251857	vvi:100261040/vvi:100852697/vvi:100251857	3
vvi00520	Amino sugar and nucleotide sugar metabolism	3/88	136/4761	0.462788	0.82723	100263079/100232911/100266184	LOC100263079/CHI4C/LOC100266184	vvi:100263079/vvi:100232911/vvi:100266184	3
vvi00920	Sulfur metabolism	1/88	34/4761	0.470885	0.82723	100260128	LOC100260128	vvi:100260128	1
vvi00061	Fatty acid biosynthesis	1/88	41/4761	0.536142	0.83683	109121515	LOC109121515	vvi:100254336	1
vvi00053	Ascorbate and aldarate metabolism	1/88	42/4761	0.54479	0.83683	100233007	LOC100233007	vvi:100233007	1
vvi03020	RNA polymerase	1/88	42/4761	0.54479	0.83683	100256088	LOC100256088	vvi:100256088	1
vvi00270	Cysteine and methionine metabolism	2/88	101/4761	0.561738	0.83683	100250615/100260128	LOC100250615/LOC100260128	vvi:100250615/vvi:100260128	2
vvi00640	Propanoate metabolism	1/88	45/4761	0.56979	0.83683	100250615	LOC100250615	vvi:100250615	1
vvi00909	Sesquiterpenoid and triterpenoid biosynthesis	1/88	45/4761	0.56979	0.83683	100254746	LOC100254746	vvi:100254746	1
vvi00071	Fatty acid degradation	1/88	48/4761	0.593431	0.83683	100232854	ADH2	vvi:100232854	1
vvi00400	Phenylalanine, tyrosine and tryptophan biosynthesis	1/88	49/4761	0.601023	0.83683	100241212	LOC100241212	vvi:100241212	1
vvi04070	Phosphatidylinositol signaling system	1/88	51/4761	0.615787	0.83683	100246006	LOC100246006	vvi:100246006	1
vvi00360	Phenylalanine metabolism	1/88	52/4761	0.622966	0.83683	100254909	LOC100254909	vvi:100254909	1
vvi00052	Galactose metabolism	1/88	53/4761	0.630012	0.83683	100257918	LOC100257918	vvi:100257918	1
vvi00410	beta-Alanine metabolism	1/88	55/4761	0.643715	0.83683	100241347	LOC100241347	vvi:100241347	1
vvi03440	Homologous recombination	1/88	55/4761	0.643715	0.83683	100259685	LOC100259685	vvi:100260976	1
vvi00970	Aminoacyl-tRNA biosynthesis	1/88	59/4761	0.669635	0.853456	100249854	LOC100249854	vvi:100249854	1
vvi01212	Fatty acid metabolism	1/88	65/4761	0.705057	0.881321	109121515	LOC109121515	vvi:100254336	1
vvi00195	Photosynthesis	1/88	76/4761	0.76052	0.932713	100252241	LOC100252241	vvi:100252241	1
vvi00040	Pentose and glucuronate interconversions	1/88	93/4761	0.826607	0.966943	100854283	LOC100854283	vvi:100854283	1
vvi00941	Flavonoid biosynthesis	1/88	96/4761	0.836232	0.966943	100267215	LOC100267215	vvi:100267215	1
vvi03018	RNA degradation	1/88	96/4761	0.836232	0.966943	100253485	LOC100253485	vvi:100253485	1
vvi01200	Carbon metabolism	3/88	253/4761	0.855144	0.966943	100256754/100854135/100260128	LOC100256754/LOC100854135/LOC100260128	vvi:100256754/vvi:100854135/vvi:100260128	3
vvi03015	mRNA surveillance pathway	1/88	106/4761	0.864655	0.966943	100263930	LOC100263930	vvi:100263930	1
vvi04120	Ubiquitin mediated proteolysis	1/88	117/4761	0.89031	0.966943	100258546	LOC100258546	vvi:100258546	1
vvi04016	MAPK signaling pathway - plant	1/88	128/4761	0.911147	0.966943	100266184	LOC100266184	vvi:100266184	1
vvi01230	Biosynthesis of amino acids	2/88	216/4761	0.914879	0.966943	100241212/100260128	LOC100241212/LOC100260128	vvi:100241212/vvi:100260128	2
vvi00190	Oxidative phosphorylation	1/88	135/4761	0.922315	0.966943	100258657	LOC100258657	vvi:100258657	1
vvi03013	RNA transport	1/88	147/4761	0.938323	0.968111	100852733	LOC100852733	vvi:100852733	1
vvi04141	Protein processing in endoplasmic reticulum	1/88	202/4761	0.978747	0.99404	100267630	LOC100267630	vvi:100267630	1
vvi03010	Ribosome	1/88	289/4761	0.996164	0.996164	7498563	rps7	vvi:7498563	1

## Sheet: A1_purple_KEGG_KEGGenrich
Table S3. KEGG pathway analysis of genes within significantly related modules identified by WGCNA.
KEGGID	Description	GeneRatio	BgRatio	pvalue	padj	geneID	geneName	keggID	Count
vvi00940	Phenylpropanoid biosynthesis	2023-03-22	193/4761	0.057309	0.30356	100254998/100249955/100257139	LOC100254998/LOC100249955/LOC100257139	vvi:100254998/vvi:100249955/vvi:100257139	3
vvi00040	Pentose and glucuronate interconversions	2023-02-22	93/4761	0.0677214	0.30356	100243265/100852528	LOC100243265/LOC100852528	vvi:100243265/vvi:100852528	2
vvi00941	Flavonoid biosynthesis	2023-02-22	96/4761	0.0715923	0.30356	104879126/100247021	LOC104879126/LOC100247021	vvi:100253950/vvi:100247021	2
vvi03018	RNA degradation	2023-02-22	96/4761	0.0715923	0.30356	104880715/100267801	LOC104880715/LOC100267801	vvi:100265941/vvi:100267801	2
vvi00944	Flavone and flavonol biosynthesis	2023-01-22	18/4761	0.0801256	0.30356	100247021	LOC100247021	vvi:100247021	1
vvi00073	Cutin, suberine and wax biosynthesis	2023-01-22	26/4761	0.113735	0.30356	100252221	LOC100252221	vvi:100252221	1
vvi04016	MAPK signaling pathway - plant	2023-02-22	128/4761	0.116901	0.30356	100266386/100233089	LOC100266386/CHI1B	vvi:100266386/vvi:100233089	2
vvi00520	Amino sugar and nucleotide sugar metabolism	2023-02-22	136/4761	0.129184	0.30356	100246897/100233089	LOC100246897/CHI1B	vvi:100246897/vvi:100233089	2
vvi00960	Tropane, piperidine and pyridine alkaloid biosynthesis	2023-01-22	30/4761	0.130097	0.30356	100254617	LOC100254617	vvi:100254617	1
vvi00100	Steroid biosynthesis	2023-01-22	36/4761	0.1541	0.323611	100252116	LOC100252116	vvi:100252116	1
vvi00640	Propanoate metabolism	2023-01-22	45/4761	0.188923	0.330616	100248878	LOC100248878	vvi:100248878	1
vvi00909	Sesquiterpenoid and triterpenoid biosynthesis	2023-01-22	45/4761	0.188923	0.330616	100232954	LOC100232954	vvi:100232954	1
vvi00620	Pyruvate metabolism	2023-01-22	83/4761	0.321438	0.519245	100248878	LOC100248878	vvi:100248878	1
vvi00270	Cysteine and methionine metabolism	2023-01-22	101/4761	0.376736	0.541057	100248878	LOC100248878	vvi:100248878	1
vvi04120	Ubiquitin mediated proteolysis	2023-01-22	117/4761	0.422255	0.541057	100245559	LOC100245559	vvi:100245559	1
vvi00010	Glycolysis / Gluconeogenesis	2023-01-22	123/4761	0.438492	0.541057	100248878	LOC100248878	vvi:100248878	1
vvi04144	Endocytosis	2023-01-22	133/4761	0.46459	0.541057	100249066	LOC100249066	vvi:100249066	1
vvi00190	Oxidative phosphorylation	2023-01-22	135/4761	0.469669	0.541057	100246249	LOC100246249	vvi:100246249	1
vvi00500	Starch and sucrose metabolism	2023-01-22	143/4761	0.489528	0.541057	100262385	LOC100262385	vvi:100262385	1
vvi04626	Plant-pathogen interaction	2023-01-22	192/4761	0.596524	0.626351	100266386	LOC100266386	vvi:100266386	1
vvi04075	Plant hormone signal transduction	2023-01-22	264/4761	0.715749	0.715749	100244072	LOC100244072	vvi:100244072	1

## Sheet: B1_yellow_KEGG_KEGGenrich
KEGGID	Description	GeneRatio	BgRatio	pvalue	padj	geneID	geneName	keggID	Count
vvi00561	Glycerolipid metabolism	4/40	76/4761	0.00354659	0.0997866	100261802/100267386/100254427/100265853	LOC100261802/LOC100267386/LOC100254427/LOC100265853	vvi:100261802/vvi:100267386/vvi:100254427/vvi:100265853	4
vvi00310	Lysine degradation	3/40	39/4761	0.00407292	0.0997866	100261802/100267386/100243837	LOC100261802/LOC100267386/LOC100243837	vvi:100261802/vvi:100267386/vvi:100243837	3
vvi00380	Tryptophan metabolism	3/40	50/4761	0.00819586	0.133866	100261802/100255199/100267386	LOC100261802/LOC100255199/LOC100267386	vvi:100261802/vvi:100255199/vvi:100267386	3
vvi00340	Histidine metabolism	2/40	20/4761	0.0118859	0.145602	100261802/100267386	LOC100261802/LOC100267386	vvi:100261802/vvi:100267386	2
vvi00010	Glycolysis / Gluconeogenesis	4/40	123/4761	0.0189186	0.16086	100261802/100267386/100254427/100242264	LOC100261802/LOC100267386/LOC100254427/LOC100242264	vvi:100261802/vvi:100267386/vvi:100254427/vvi:100242264	4
vvi00073	Cutin, suberine and wax biosynthesis	2/40	26/4761	0.0196972	0.16086	100254406/100259719	LOC100254406/LOC100259719	vvi:100254406/vvi:100259719	2
vvi00500	Starch and sucrose metabolism	4/40	143/4761	0.0308782	0.216147	100255167/100244135/100242115/100260409	LOC100255167/LOC100244135/LOC100242115/LOC100260409	vvi:100255167/vvi:100244135/vvi:100242115/vvi:100260409	4
vvi00040	Pentose and glucuronate interconversions	3/40	93/4761	0.0423774	0.259562	100251082/100254427/100245002	LOC100251082/LOC100254427/LOC100245002	vvi:100251082/vvi:100254427/vvi:100245002	3
vvi00053	Ascorbate and aldarate metabolism	2/40	42/4761	0.0479795	0.261222	100261802/100267386	LOC100261802/LOC100267386	vvi:100261802/vvi:100267386	2
vvi00071	Fatty acid degradation	2/40	48/4761	0.0609216	0.298516	100261802/100267386	LOC100261802/LOC100267386	vvi:100261802/vvi:100267386	2
vvi00280	Valine, leucine and isoleucine degradation	2/40	53/4761	0.072514	0.300738	100261802/100267386	LOC100261802/LOC100267386	vvi:100261802/vvi:100267386	2
vvi00410	beta-Alanine metabolism	2/40	55/4761	0.0773379	0.300738	100261802/100267386	LOC100261802/LOC100267386	vvi:100261802/vvi:100267386	2
vvi00330	Arginine and proline metabolism	2/40	56/4761	0.0797876	0.300738	100261802/100267386	LOC100261802/LOC100267386	vvi:100261802/vvi:100267386	2
vvi00460	Cyanoamino acid metabolism	2/40	64/4761	0.100217	0.321297	100254058/100260409	LOC100254058/LOC100260409	vvi:100254058/vvi:100260409	2
vvi01212	Fatty acid metabolism	2/40	65/4761	0.102867	0.321297	100242694/100259451	LOC100242694/LOC100259451	vvi:100242694/vvi:100259451	2
vvi00520	Amino sugar and nucleotide sugar metabolism	3/40	136/4761	0.104913	0.321297	100251292/100250948/100242115	LOC100251292/LOC100250948/LOC100242115	vvi:100251292/vvi:100250948/vvi:100242115	3
vvi00290	Valine, leucine and isoleucine biosynthesis	1/40	15/4761	0.11904	0.343117	novel.402	-	vvi:100262542	1
vvi00780	Biotin metabolism	1/40	16/4761	0.126465	0.344267	100242694	LOC100242694	vvi:100242694	1
vvi00620	Pyruvate metabolism	2/40	83/4761	0.153463	0.395772	100261802/100267386	LOC100261802/LOC100267386	vvi:100261802/vvi:100267386	2
vvi00904	Diterpenoid biosynthesis	1/40	23/4761	0.176758	0.409167	100249739	LOC100249739	vvi:100249739	1
vvi00770	Pantothenate and CoA biosynthesis	1/40	24/4761	0.183708	0.409167	novel.402	-	vvi:100262542	1
vvi01040	Biosynthesis of unsaturated fatty acids	1/40	24/4761	0.183708	0.409167	100259451	LOC100259451	vvi:100259451	1
vvi04626	Plant-pathogen interaction	3/40	192/4761	0.217427	0.448442	100253469/100265531/100250838	LOC100253469/LOC100265531/LOC100250838	vvi:100254180/vvi:100265531/vvi:100250838	3
vvi00940	Phenylpropanoid biosynthesis	3/40	193/4761	0.219645	0.448442	100265025/100250514/100260409	LOC100265025/LOC100250514/LOC100260409	vvi:100265025/vvi:100250514/vvi:100260409	3
vvi00920	Sulfur metabolism	1/40	34/4761	0.250137	0.490268	100264525	LOC100264525	vvi:100264525	1
vvi00062	Fatty acid elongation	1/40	38/4761	0.275205	0.50126	100259451	LOC100259451	vvi:100259451	1
vvi04016	MAPK signaling pathway - plant	2/40	128/4761	0.292388	0.50126	100259857/100251367	LOC100259857/LOC100251367	vvi:100259857/vvi:100251367	2
vvi00061	Fatty acid biosynthesis	1/40	41/4761	0.293469	0.50126	100242694	LOC100242694	vvi:100242694	1
vvi00510	N-Glycan biosynthesis	1/40	42/4761	0.299457	0.50126	100265912	LOC100265912	vvi:100265912	1
vvi04144	Endocytosis	2/40	133/4761	0.30807	0.50126	100242736/100255904	LOC100242736/LOC100255904	vvi:100242736/vvi:100255904	2
vvi00909	Sesquiterpenoid and triterpenoid biosynthesis	1/40	45/4761	0.317124	0.50126	100259856	LOC100259856	vvi:100259856	1
vvi00900	Terpenoid backbone biosynthesis	1/40	51/4761	0.351165	0.506996	109122203	LOC109122203	vvi:100241072	1
vvi04070	Phosphatidylinositol signaling system	1/40	51/4761	0.351165	0.506996	100265853	LOC100265853	vvi:100265853	1
vvi00240	Pyrimidine metabolism	1/40	52/4761	0.356675	0.506996	100257633	LOC100257633	vvi:100257633	1
vvi00052	Galactose metabolism	1/40	53/4761	0.36214	0.506996	100251292	LOC100251292	vvi:100251292	1
vvi01210	2-Oxocarboxylic acid metabolism	1/40	56/4761	0.378264	0.507944	novel.402	-	vvi:100262542	1
vvi00051	Fructose and mannose metabolism	1/40	57/4761	0.383549	0.507944	100242115	LOC100242115	vvi:100242115	1
vvi00710	Carbon fixation in photosynthetic organisms	1/40	61/4761	0.404258	0.52128	100242264	LOC100242264	vvi:100242264	1
vvi00260	Glycine, serine and threonine metabolism	1/40	65/4761	0.424287	0.533079	100261802	LOC100261802	vvi:100261802	1
vvi04146	Peroxisome	1/40	74/4761	0.466983	0.572054	100259719	LOC100259719	vvi:100259719	1
vvi00230	Purine metabolism	1/40	86/4761	0.519137	0.620432	100264525	LOC100264525	vvi:100264525	1
vvi00564	Glycerophospholipid metabolism	1/40	91/4761	0.539368	0.622265	100265853	LOC100265853	vvi:100265853	1
vvi01230	Biosynthesis of amino acids	2/40	216/4761	0.548113	0.622265	novel.402/100242264	-/LOC100242264	vvi:100262542/vvi:100242264	2
vvi03018	RNA degradation	1/40	96/4761	0.558769	0.622265	100256670	LOC100256670	vvi:100256670	1
vvi03015	mRNA surveillance pathway	1/40	106/4761	0.595209	0.648116	100256670	LOC100256670	vvi:100256670	1
vvi04120	Ubiquitin mediated proteolysis	1/40	117/4761	0.631906	0.673117	100247826	LOC100247826	vvi:100247826	1
vvi04075	Plant hormone signal transduction	2/40	264/4761	0.659388	0.687448	100251367/100255446	LOC100251367/LOC100255446	vvi:100251367/vvi:100255446	2
vvi03013	RNA transport	1/40	147/4761	0.716276	0.731198	100256670	LOC100256670	vvi:100256670	1
vvi01200	Carbon metabolism	1/40	253/4761	0.888465	0.888465	100242264	LOC100242264	vvi:100242264	1

## Sheet: B2_red_KEGG_KEGGenrich
KEGGID	Description	GeneRatio	BgRatio	pvalue	padj	geneID	geneName	keggID	Count
vvi04070	Phosphatidylinositol signaling system	2023-02-17	51/4761	0.0138079	0.28413	100242009/100249271	LOC100242009/LOC100249271	vvi:100242009/vvi:100249271	2
vvi00196	Photosynthesis - antenna proteins	2023-01-17	19/4761	0.0658267	0.28413	100252066	LOC100252066	vvi:100252066	1
vvi00730	Thiamine metabolism	2023-01-17	23/4761	0.079155	0.28413	100249779	LOC100249779	vvi:100249779	1
vvi00904	Diterpenoid biosynthesis	2023-01-17	23/4761	0.079155	0.28413	100245189	LOC100245189	vvi:100245189	1
vvi00908	Zeatin biosynthesis	2023-01-17	24/4761	0.0824591	0.28413	100247527	LOC100247527	vvi:100247527	1
vvi00906	Carotenoid biosynthesis	2023-01-17	34/4761	0.114891	0.28413	100232875	BCH1	vvi:100232875	1
vvi03430	Mismatch repair	2023-01-17	36/4761	0.121247	0.28413	100241314	LOC100241314	vvi:100253881	1
vvi04626	Plant-pathogen interaction	2023-02-17	192/4761	0.148253	0.28413	100255919/100249271	LOC100255919/LOC100249271	vvi:100255919/vvi:100249271	2
vvi00909	Sesquiterpenoid and triterpenoid biosynthesis	2023-01-17	45/4761	0.149319	0.28413	100853679	LOC100853679	vvi:100853679	1
vvi03030	DNA replication	2023-01-17	46/4761	0.152385	0.28413	100241314	LOC100241314	vvi:100253881	1
vvi00380	Tryptophan metabolism	2023-01-17	50/4761	0.164548	0.28413	100256048	LOC100256048	vvi:100256048	1
vvi00562	Inositol phosphate metabolism	2023-01-17	54/4761	0.176545	0.28413	100242009	LOC100242009	vvi:100242009	1
vvi03440	Homologous recombination	2023-01-17	55/4761	0.179519	0.28413	100241314	LOC100241314	vvi:100253881	1
vvi03420	Nucleotide excision repair	2023-01-17	59/4761	0.191315	0.28413	100241314	LOC100241314	vvi:100253881	1
vvi04712	Circadian rhythm - plant	2023-01-17	63/4761	0.20295	0.28413	100261472	LOC100261472	vvi:100261472	1
vvi00564	Glycerophospholipid metabolism	2023-01-17	91/4761	0.280094	0.367624	100257695	LOC100257695	vvi:100257695	1
vvi04016	MAPK signaling pathway - plant	2023-01-17	128/4761	0.371296	0.454451	100249271	LOC100249271	vvi:100249271	1
vvi00520	Amino sugar and nucleotide sugar metabolism	2023-01-17	136/4761	0.389529	0.454451	100246816	LOC100246816	vvi:100246816	1
vvi00940	Phenylpropanoid biosynthesis	2023-01-17	193/4761	0.505747	0.548175	100855108	LOC100855108	vvi:100855108	1
vvi04141	Protein processing in endoplasmic reticulum	2023-01-17	202/4761	0.522071	0.548175	100243929	LOC100243929	vvi:100243929	1
vvi04075	Plant hormone signal transduction	2023-01-17	264/4761	0.621479	0.621479	100266808	LOC100266808	vvi:100266808	1

## Sheet: B3_brown_KEGG_KEGGenrich
KEGGID	Description	GeneRatio	BgRatio	pvalue	padj	geneID	geneName	keggID	Count
vvi00270	Cysteine and methionine metabolism	7/71	101/4761	0.000686265	0.0391171	100232928/100255091/100245243/100263876/100247043/100232924/104879260	LOC100232928/LOC100255091/METK3/LOC100263876/LOC100247043/LOC100232924/LOC104879260	vvi:100232928/vvi:100255091/vvi:100245243/vvi:100263876/vvi:100247043/vvi:100232924/vvi:100232920	7
vvi00910	Nitrogen metabolism	4/71	35/4761	0.0016774	0.0478058	100249137/100242605/100245575/100241340	LOC100249137/LOC100242605/LOC100245575/LOC100241340	vvi:100249137/vvi:100242605/vvi:100245575/vvi:100241340	4
vvi00630	Glyoxylate and dicarboxylate metabolism	5/71	72/4761	0.00412684	0.0757058	100242605/100245575/100232924/100232861/100261289	LOC100242605/LOC100245575/LOC100232924/GCAT/LOC100261289	vvi:100242605/vvi:100245575/vvi:100232924/vvi:100853165/vvi:100261289	5
vvi04075	Plant hormone signal transduction	10/71	264/4761	0.00531269	0.0757058	100261550/100266747/100265255/100242451/100853603/novel.123/100256520/100255176/100258257/100261619	LOC100261550/LOC100266747/LOC100265255/LOC100242451/LOC100853603/-/LOC100256520/LOC100255176/LOC100258257/LOC100261619	vvi:100261550/vvi:100266747/vvi:100265255/vvi:100242451/vvi:100853603/vvi:100256742/vvi:100256520/vvi:100255176/vvi:100258257/vvi:100261619	10
vvi00051	Fructose and mannose metabolism	4/71	57/4761	0.00989647	0.11282	100265177/100260218/100261910/100267094	LOC100265177/LOC100260218/LOC100261910/LOC100267094	vvi:100265177/vvi:100260218/vvi:100261910/vvi:100267094	4
vvi00460	Cyanoamino acid metabolism	4/71	64/4761	0.0147272	0.135935	100255091/100245575/100252190/100261289	LOC100255091/LOC100245575/LOC100252190/LOC100261289	vvi:100255091/vvi:100245575/vvi:100252190/vvi:100261289	4
vvi00062	Fatty acid elongation	3/71	38/4761	0.0184645	0.135935	100257722/100244668/100257977	LOC100257722/LOC100244668/LOC100257977	vvi:100257722/vvi:100244668/vvi:100257977	3
vvi00500	Starch and sucrose metabolism	6/71	143/4761	0.0190786	0.135935	100243756/100247246/100252190/100232951/100243677/100253092	LOC100243756/LOC100247246/LOC100252190/CWINV/LOC100243677/LOC100253092	vvi:100243756/vvi:100247246/vvi:100252190/vvi:100232951/vvi:100243677/vvi:100255689	6
vvi04016	MAPK signaling pathway - plant	5/71	128/4761	0.0412114	0.261006	100263876/100242451/100853603/novel.123/100232861	LOC100263876/LOC100242451/LOC100853603/-/GCAT	vvi:100263876/vvi:100242451/vvi:100853603/vvi:100256742/vvi:100853165	5
vvi00073	Cutin, suberine and wax biosynthesis	2/71	26/4761	0.0566197	0.308218	100258457/100254606	LOC100258457/LOC100254606	vvi:100258457/vvi:100254606	2
vvi00592	alpha-Linolenic acid metabolism	3/71	60/4761	0.0594806	0.308218	100264033/100526774/100267750	LOC100264033/LOC100526774/LOC100267750	vvi:100264033/vvi:100526774/vvi:100267750	3
vvi00960	Tropane, piperidine and pyridine alkaloid biosynthesis	2/71	30/4761	0.0729754	0.346633	100252918/100249681	LOC100252918/LOC100249681	vvi:100252918/vvi:100249681	2
vvi01200	Carbon metabolism	7/71	253/4761	0.0812215	0.356125	100255091/100265177/100245575/100247043/100232924/100232861/100261289	LOC100255091/LOC100265177/LOC100245575/LOC100247043/LOC100232924/GCAT/LOC100261289	vvi:100255091/vvi:100265177/vvi:100245575/vvi:100247043/vvi:100232924/vvi:100853165/vvi:100261289	7
vvi00920	Sulfur metabolism	2/71	34/4761	0.0906424	0.36148	100255091/100247043	LOC100255091/LOC100247043	vvi:100255091/vvi:100247043	2
vvi00945	Stilbenoid, diarylheptanoid and gingerol biosynthesis	2/71	36/4761	0.0999031	0.36148	100259140/100251539	LOC100259140/LOC100251539	vvi:100259140/vvi:100251539	2
vvi01230	Biosynthesis of amino acids	6/71	216/4761	0.101468	0.36148	100242605/100255091/100265177/100245243/100247043/100261289	LOC100242605/LOC100255091/LOC100265177/METK3/LOC100247043/LOC100261289	vvi:100242605/vvi:100255091/vvi:100265177/vvi:100245243/vvi:100247043/vvi:100261289	6
vvi00590	Arachidonic acid metabolism	1/71	10/4761	0.139632	0.468177	100245705	LOC100245705	vvi:100245705	1
vvi00040	Pentose and glucuronate interconversions	3/71	93/4761	0.160718	0.508941	100243033/100247757/100264944	LOC100243033/LOC100247757/LOC100264944	vvi:100243033/vvi:100247757/vvi:100264944	3
vvi00052	Galactose metabolism	2/71	53/4761	0.18672	0.554427	100260266/100232951	LOC100260266/CWINV	vvi:100260266/vvi:100232951	2
vvi00999	Biosynthesis of secondary metabolites - unclassified	1/71	15/4761	0.202052	0.554427	100251539	LOC100251539	vvi:100251539	1
vvi00531	Glycosaminoglycan degradation	1/71	16/4761	0.213989	0.554427	100257389	LOC100257389	vvi:100257389	1
vvi00902	Monoterpenoid biosynthesis	1/71	16/4761	0.213989	0.554427	109122810	LOC109122810	vvi:100246450	1
vvi00710	Carbon fixation in photosynthetic organisms	2/71	61/4761	0.230549	0.571361	100265177/100232924	LOC100265177/LOC100232924	vvi:100265177/vvi:100232924	2
vvi00565	Ether lipid metabolism	1/71	20/4761	0.260003	0.592806	100259366	LOC100259366	vvi:100259366	1
vvi00670	One carbon pool by folate	1/71	20/4761	0.260003	0.592806	100261289	LOC100261289	vvi:100261289	1
vvi00730	Thiamine metabolism	1/71	23/4761	0.29276	0.596256	100265774	THI1-2	vvi:100265774	1
vvi00904	Diterpenoid biosynthesis	1/71	23/4761	0.29276	0.596256	100264747	LOC100264747	vvi:100264747	1
vvi04146	Peroxisome	2/71	74/4761	0.3028	0.596256	100232861/100254606	GCAT/LOC100254606	vvi:100853165/vvi:100254606	2
vvi01040	Biosynthesis of unsaturated fatty acids	1/71	24/4761	0.303358	0.596256	100257722	LOC100257722	vvi:100257722	1
vvi00220	Arginine biosynthesis	1/71	34/4761	0.401092	0.755354	100242605	LOC100242605	vvi:100242605	1
vvi00100	Steroid biosynthesis	1/71	36/4761	0.41895	0.755354	100257622	LOC100257622	vvi:100257622	1
vvi00130	Ubiquinone and other terpenoid-quinone biosynthesis	1/71	40/4761	0.453106	0.755354	100251539	LOC100251539	vvi:100251539	1
vvi03410	Base excision repair	1/71	40/4761	0.453106	0.755354	100256507	LOC100256507	vvi:100256507	1
vvi00909	Sesquiterpenoid and triterpenoid biosynthesis	1/71	45/4761	0.493028	0.755354	100266449	LOC100266449	vvi:100266449	1
vvi00030	Pentose phosphate pathway	1/71	47/4761	0.50818	0.755354	100265177	LOC100265177	vvi:100265177	1
vvi00250	Alanine, aspartate and glutamate metabolism	1/71	47/4761	0.50818	0.755354	100242605	LOC100242605	vvi:100242605	1
vvi00071	Fatty acid degradation	1/71	48/4761	0.515587	0.755354	100258457	LOC100258457	vvi:100258457	1
vvi00350	Tyrosine metabolism	1/71	49/4761	0.522885	0.755354	100246657	LOC100246657	vvi:100246657	1
vvi00380	Tryptophan metabolism	1/71	50/4761	0.530074	0.755354	100232861	GCAT	vvi:100853165	1
vvi00020	Citrate cycle (TCA cycle)	1/71	51/4761	0.537156	0.755354	100232924	LOC100232924	vvi:100232924	1
vvi00480	Glutathione metabolism	2/71	121/4761	0.543325	0.755354	100245705/100256345	LOC100245705/LOC100256345	vvi:100245705/vvi:100232878	2
vvi03440	Homologous recombination	1/71	55/4761	0.564448	0.766037	104878298	LOC104878298	vvi:100257115	1
vvi04141	Protein processing in endoplasmic reticulum	3/71	202/4761	0.586145	0.77115	100260546/100256023/100246467	LOC100260546/LOC100256023/LOC100246467	vvi:100260546/vvi:100245734/vvi:100246467	3
vvi04144	Endocytosis	2/71	133/4761	0.595274	0.77115	100259366/novel.453	LOC100259366/-	vvi:100259366/vvi:100252781	2
vvi00260	Glycine, serine and threonine metabolism	1/71	65/4761	0.625929	0.775607	100261289	LOC100261289	vvi:100261289	1
vvi01212	Fatty acid metabolism	1/71	65/4761	0.625929	0.775607	100257722	LOC100257722	vvi:100257722	1
vvi00195	Photosynthesis	1/71	76/4761	0.683702	0.829171	100242600	LOC100242600	vvi:100242600	1
vvi00620	Pyruvate metabolism	1/71	83/4761	0.715788	0.844696	100232924	LOC100232924	vvi:100232924	1
vvi04145	Phagosome	1/71	86/4761	0.728536	0.844696	novel.453	-	vvi:100252781	1
vvi00564	Glycerophospholipid metabolism	1/71	91/4761	0.748542	0.844696	100259366	LOC100259366	vvi:100259366	1
vvi00941	Flavonoid biosynthesis	1/71	96/4761	0.767092	0.844696	100251539	LOC100251539	vvi:100251539	1
vvi04626	Plant-pathogen interaction	2/71	192/4761	0.787962	0.844696	100251912/100242451	LOC100251912/LOC100242451	vvi:100251912/vvi:100242451	2
vvi00940	Phenylpropanoid biosynthesis	2/71	193/4761	0.790404	0.844696	100251539/100252190	LOC100251539/LOC100252190	vvi:100251539/vvi:100252190	2
vvi03015	mRNA surveillance pathway	1/71	106/4761	0.800238	0.844696	100245696	LOC100245696	vvi:100245696	1
vvi04120	Ubiquitin mediated proteolysis	1/71	117/4761	0.831342	0.861353	100256145	LOC100256145	vvi:100256145	1
vvi00010	Glycolysis / Gluconeogenesis	1/71	123/4761	0.846241	0.861353	100265177	LOC100265177	vvi:100265177	1
vvi03010	Ribosome	1/71	289/4761	0.988669	0.988669	109122023	LOC109122023	vvi:100247214	1
